# Supplementary material for: Coastal Sea Level Monitoring in the Mediterranean and Black Seas
Source: Copernicus journal article supplement (doi:10.5194/os-2021-125), 2022-01-20
Supplement: Supplementary file [file os-2021-125-AC2-supplement.zip]

### List of Acronyms:

- ADCP: Acoustic Doppler Current Profiler
- AMGI: Andrija Mohorovičić Geophysical Institute (Croatia)
- BMA: Bayesian Model Average
- BOLAM: Hydrostatic Meteorological Limited Area Model developed by Consiglio Nazionale delle Ricerche (CNR) and Istituto di Scienze dell'Atmosfera e del Clima (ISAC, Bologna)
- CA: Cadastre Agency, Ministry of Regional Development and Public Works (CA)
- CIESM: The Mediterranean Science Commission. Intergovernmental Commission for the Scientific Exploration of the Mediterranean Sea
- CNR: Italian National Research Council
- CUT: Cyprus University of Technology
- DFMR: Department of Fisheries and Marine Research Oceanography Unit (Cyprus)
- DLS: Department of Lands and Surveys in Cyprus
- ECMWF: European Centre for Medium-Range Weather Forecasts
- EMODnet: European Marine Observation and Data Network, <https://emodnet.ec.europa.eu>
- ENSURF: Ensemble SURge Forecast
- ESEAS-RI: European Sea-Level Service Research Infrastructure (European Framework Program V).
- EVRF2019: European Vertical Reference System 2019
- FAIR: Findable, Accessible, Interoperable and Reusable
- GESLA: Global Extreme Sea Level Analysis, <http://www.gesla.org>
- GLOSS: Global Sea Level Observing System
- GNSS: Global Navigation Satellite System
- GNSS-IR: GNSS Interferometric Reflectometry
- GPRS: General Packet Radio Service (packet oriented mobile data standard on 2G/3G/4G for mobile communications)
- GRS80: Global Reference System 1980
- GSM: Global System for Mobile Communications
- HHI: Hydrographic Institute of the Republic of Croatia
- HNHS: Hellenic Navy Hydrographic Service
- IBI-MFC: Iberia-Biscay-Ireland Monitoring and Forecasting Centre (Copernicus Marine Service)
- ICG/NEAMTWS: Intergovernmental Coordination Group for the Tsunami Early Warning and Mitigation System in the North-eastern Atlantic
- ICM/CSIC: Instituto de Ciencias del Mar/Consejo Superior de Investigaciones Científicas (Marine Sciences Research Institute in Barcelona)
- IDSL: Inexpensive Device for Sea Level
- IEO: Instituto Español de Oceanografía (Spanish Oceanographic Institute)
- IGN: Instituto Geográfico Nacional
- IHM: Instituto Hidrográfico de la Marina (Spanish Hydrographic Office)
- IHO: International Hydrographic Organization
- INCT: National Institute of Cartography and Remote Sensing Algeria
- IO-BAS: Institute of Oceanology, Bulgarian Academy of Sciences (IO-BAS)
- IOC/UNESCO: Intergovernmental Oceanographic Commission from UNESCO

- IOC-SLSMF: Intergovernmental Oceanographic Commission Sea Level Station Monitoring Facility
- IOF: Institute of Oceanography and Fisheries in Croatia
- IOLR: Israel Oceanographic and Limnological Research
- ISMAR: Institute of Marine Sciences (Italy)
- ISPRA: Istituto Superiore per la Protezione e la Ricerca Ambientale (Italian Institute for Environmental Protection and Research, Italy)
- JRC: Joint Research Centre, European Union
- JRC-SLD: Joint Research Centre Sea Level Database
- JRC-TAD: Joint Research Centre Tsunami Alert Device
- KOERI: Kandilli Observatory and Earthquake Research Institute
- LAT: Lowest Astronomical Tide
- M/BS: Mediterranean and Black Sea
- MedGLOSS: Mediterranean component of the Global Sea Level Observing System
- MED-MFC: Mediterranean Monitoring and Forecasting Centre (Copernicus Marine Service)
- MISELA: Minute Sea Level Analysis product
- MONGOOS: Mediterranean Oceanography Network for the Global Ocean Observing System, [www.mongoos.eu](http://www.mongoos.eu)
- MSL: Mean Sea Level
- NAO: North Atlantic Oscillation
- NIMH: National Institute of Meteorology and Hydrology, Bulgarian Academy of Sciences
- NIRMD “Grigore Antipa”: National Institute for Marine Research and Development “Grigore Antipa” (Romania)
- NIOF: National Institute of Oceanography and Fisheries
- NRT: Near-real time
- NOC: National Oceanographic Centre (UK)
- PdE: Puertos del Estado (Ports of Spain)
- PI: Port Infrastructure (Bulgary)
- PSMSL: Permanent Service for Mean Sea Level
- OC-UCY: Oceanography Centre University of Cyprus
- ORION: Joint Research and Development Centre, Cyprus
- RBI: Ruđer Bošković Institute
- REDMAR: Sea level observation network of Spanish Harbours
- REDNAP: Red de Nivelación de Alta Precisión (High Precision Levelling Network)
- RLR: Revised Local Reference
- RMLV: Rete Mareografica della Laguna di Venezia e del Litorale Nord Adriatico
- RMN: Rete Mareografica Nazionale
- RONIM: Sea Level Observation Network in France
- SeaDataNet: Pan-European Infrastructure for Ocean and Marine Data Management
- SHOM: Service Hydrographique et Oceanographique de la Marine (France)
- SHYFEM: Shallow Water Hydrodynamic Finite Element Model
- SOCIB: Balearic Islands Coastal Observing and Forecasting System
- SONEL: GNSS data assembly centre for the Global Sea Level Observing System (GLOSS)
- TAC: Thematic Assembly Centre
- TGBM: Tide Gauge Bench Mark
- TUDES: Turkish National Sea Level Monitoring System

- UHSLC: University of Hawaii Sea Level Center
- VLM: Vertical Land Movement
- VPN: Virtual Private Network
- VRSH: Vertical Reference Surface for Hydrography
- WGS84: World Geodetic System 1984
- ZMPS: Zero Tide Level used as reference benchmark for tide measurements in the Lagoon of Venice
